1  
2  
3  
4  
5  
6  
7  
8  
9  
10  
11  
12  
13  
14  
15  
16  
17  
18  
19  
20  
21  
22

**Pattern and Risk Factors for Nocturnal Enuresis among Children in Aseer Region,  
Southwestern Saudi Arabia: A cross-sectional study**

**Running title:** Pattern of Nocturnal Enuresis in Children

Author 1 : Youssef Ali Alqahtani, MD, Department of Child Health, College of Medicine,  
King Khalid University, Abha 62529, Saudi Arabia Email: youssef9811@hotmail.com

Author 2 : Ayed A. Shati, MD, Department of Child Health, College of Medicine, King  
Khalid University, Abha 62529, Saudi Arabia Email: shatiayed@gmail.com

Author 3 : Ahmad A Alhanshani, MD, Department of Child Health, College of Medicine,  
King Khalid University, Abha 62529, Saudi Arabia Email: smuadi@kku.edu.sa

Author 4 : Abdulaziz M. Al-Garni, MD, Department of Medicine, College of Medicine,  
King Khalid University, Abha, Saudi Arabia Email: [amoalqarni@kku.edu.sa](mailto:amoalqarni@kku.edu.sa)

Author 5 : Syed Esam Mahmood, MD, Department of Family and Community Medicine,  
College of Medicine, King Khalid University, Abha 62529, Saudi Arabia Email:  
smahmood@kku.edu.sa

Corresponding author: Syed Esam Mahmood E-mail address=smahmood@kku.edu.sa

Phone number:+966550484344

23

24

25

26 **Abstract**

27 **Background**

28 Nocturnal enuresis is defined as persistent bed-wetting at night beyond the age of five year  
29 old. To assess the prevalence and risk factors for nocturnal enuresis in children of the Aseer  
30 region.

31 **Materials and methods**

32 A descriptive cross-sectional survey via an online questionnaire was conducted targeting all  
33 accessible populations who are involved in childcare (5 to 18 years of age) in the Aseer  
34 region of Saudi Arabia. The questionnaire was circulated online using social media platforms  
35 by the research team. The questionnaire included items to address sociodemographic data  
36 of the child and the family, their medical history, and bed-wetting-related information.

37 **Results**

38 The study included 466 children, of which 145 (31.1%) complained of recurrent bedwetting.  
39 More than half of the children who experienced nocturnal enuresis were males (58.6% ), and  
40 31.7% were aged between 7-8 years, with a mean age of 5.9 years. A comparable  
41 proportion of fathers (59.3%) and mothers (57.9%) of the sampled children were university  
42 graduates. A total of 104 (71.7%) children started bed-wetting at 5 years of age, and 19.3%  
43 experienced bed-wetting from 6-7 years. Also, 126 (90%) children reported bed-wetting  
44 during sleep. Attention-deficit hyperactivity disorder, dark phobia, family troubles, and  
45 exposure to bullying were the most frequently reported risk factors.

46 **Conclusion**

47 Nearly 1 out of 3 children experienced bed-wetting, which is relatively common in boys than  
48 girls. Early toilet training and a supportive parental attitude toward bed-wetting is essential to  
49 improve the child's quality of life.

50 **Keywords**

51 *Pattern, Nocturnal enuresis, Children, Risk factors*

52

53

54

55

## 56 **INTRODUCTION**

57 Enuresis refers to the involuntary loss of urine during sleep that occurs at least twice a week  
58 in children older than 5 years of age (or the developmental equivalent) for at least 3 months,  
59 and it is the most common urologic complaint in pediatric patients. The International  
60 Children's Continence Society has defined enuresis as wetting that occurs at night, whereas  
61 they no longer refer to daytime incontinence as diurnal enuresis.<sup>1</sup> While the condition is not a  
62 serious health problem, it affects school-age children and even teenagers, and can be  
63 upsetting for the child as well as the family.<sup>1,2</sup> Nocturnal enuresis is 2-3 times more common  
64 in boys than girls. About 20% of all children report occasional instances of bed-wetting until  
65 the age of 5 years, and up to 10% still have problems by 7 years of age. Also, an estimated  
66 1-3% of teenagers report incidences of bed-wetting.<sup>3-5</sup>

67 Most children are fully toilet trained by 5 years of age; nevertheless, there is no specific date  
68 for developing complete bladder and bowel control. Often there are worrisome instances of  
69 bed-wetting for some children between 5 and 7 years of age, and a small proportion of  
70 children still wet the bed after 7 years of age.<sup>6,7</sup> Therefore, parents should consult a  
71 pediatrician or any healthcare worker who is experienced in treating children with NE  
72 if the condition persists beyond 7 years of age, if the child starts to wet the bed after a few  
73 months of being dry at night, and if bed-wetting is accompanied by painful urination, unusual  
74 thirst, pink or red urine, hard stools, or snoring.<sup>8</sup>

75 Bed-wetting or enuresis is categorized as primary enuresis—urinary incontinence in a child  
76 who has never been dry, and secondary enuresis—incontinence in a child who has been dry  
77 for at least six months.<sup>9</sup> Nocturnal enuresis in children is the second most reported pediatric  
78 problem after allergic diseases.<sup>10</sup> Further, children with enuresis can develop a variety of  
79 behavioral, psychological, and social problems, including shame, blushing, lack of self-  
80 esteem, and aggression.<sup>9-10</sup> Hence, it is important to identify the children at risk and  
81 implement therapeutic measures for treatment.

82 Many causative factors have been associated with bed-wetting, such as developmental  
83 differences, including the development of a child's urinary sphincters, and diseases like

84 diabetes and urinary tract infections. Emotional changes and conflicts, such as the birth of a  
85 new baby, scholastic or educational burden, and emotional crises, such as parental  
86 separation or divorce and family conflicts, are also reported as contributory factors.<sup>11-12</sup>  
87 Having a global incidence of 1.4–28% among 6-12 years old children, the condition is  
88 troublesome for the families of these children, as it can result in considerable emotional  
89 distress and psychological consequences.<sup>13-14</sup> In this light, the current study aims to assess  
90 the prevalence and pattern of nocturnal enuresis among the children of the general Aseer  
91 region population in southern Saudi Arabia.

92

### 93 **MATERIALS AND METHODS**

94 A cross-sectional design was used to conduct this descriptive study through a survey. All  
95 accessible populations who are involved in pediatric care (for children below the age of 18  
96 years) in the Aseer region of Saudi Arabia were invited to participate. Those participants  
97 above 18 years and those not willing to participate were excluded. Children with  
98 nocturnal enuresis secondary to other medical disorders or accompanying disorders  
99 like bowel and bladder dysfunction were also excluded. Clarifying the inclusion and  
100 exclusion criteria would help readers better understand the study population. The  
101 study was conducted in accordance with the Declaration of Helsinki. The Research Ethics  
102 Committee at King Khalid University provided ethical approval for the study (Approval  
103 number ECM#2020-0904), and data collection was started afterward with an electronic  
104 questionnaire. The questionnaire was circulated online by the researchers and their  
105 acquaintances through social media platforms seeking participation from eligible families  
106 with children to fill out the attached tool. The parents filled the questionnaires. Participation  
107 in this study was entirely voluntary, and confidentiality and anonymity were assured.  
108 Electronic informed consent was attached before the questionnaire in the provided links and  
109 the participants had approved before filling the questionnaire. The online questionnaire was  
110 designed by the research team under the guidance and consultation of a subject expert. The  
111 data collection was started on 1 July 2021 and continued till 31 December 2021. At the  
112 beginning of the questionnaire, a single question was put up enquiring whether the  
113 participating family had a child with recurrent bedwetting. In case of an affirmative response,

114 the participant was directed to the subsequent questionnaire items, which covered the  
115 following items - socio-demographic data of the child and the family (age, gender, residential  
116 address, parents' education, parents' occupational details, and family history of chronic  
117 diseases); specific history of the child including chronic health problems, child-related  
118 stressors, environmental stressors, child abuse, and bullying; details of bed-wetting (age of  
119 onset, frequency, and effects on the child). According to Epi info Version, a sample size of  
120 384 participants was estimated with a 5% margin of error and a 95% confidence interval <sup>15</sup>.  
121 However, the statistical analysis and results were conducted on a sample of 466 children. A  
122 total of 500 people were invited. The response rate was 93.2%. Consistent reminders  
123 were employed to achieve this high response rate and address the possibility of non-  
124 response bias. To ensure the effectiveness and clarity of the questionnaire, it  
125 underwent a pilot test. Feedback, suggestions, and comments from the pilot test  
126 were used to refine and modify the questionnaire, making it more comprehensive  
127 and easily understandable for participants.

128 All statistical analyses were performed using SPSS version 22.0 (IBM Inc. Chicago, IL) using  
129 two-tailed tests, and a p-value < 0.05 was considered statistically significant. Descriptive  
130 analysis using frequency and percent distribution was done for all variables, which included  
131 the prevalence of bed-wetting among sampled families, demographic data of the children  
132 and their family, medical condition, family history of bed-wetting, bed-wetting data, risk  
133 factors, and consequences. Attention-deficit hyperactivity disorder (ADHD), dark  
134 phobia, family troubles, and exposure to bullying was diagnosed by a child and  
135 adolescent psychiatrist, and these children were under treatment for these  
136 conditions.

## 137 **RESULTS**

138 Out of a total of 466 children, 145 (31.1%) children had instances of recurrent nocturnal  
139 enuresis. Out of these 145 children, more than half were males (58.6%; 85), and 31.7%  
140 were aged between 7-8 years, with a mean age of  $5.9 \pm 2.4$  years old. Regarding the  
141 residential background, 96 (66.2%) children were from urban areas; further, 24.8% were the  
142 first-born child, while 37.9% were the fourth child or after. Perinatal complications during  
143 birth were reported for 19 (13.1%) children, and 15.9% had a chronic health problem, which

144 was either constipation (6.2%), recurrent urinary tract infection (UTI) (3.4%), or sinusitis  
145 (2.8%) (Table 1).

146 Table 2 presents the demographic data for families of the children with nocturnal enuresis –  
147 a comparable proportion of fathers and mothers (59.3% and 57.9%, respectively) of these  
148 children were university graduates. Ninety-seven children had working fathers (66.9%)  
149 children, while only 50 children (34.5%) children had working mothers; 12 children (8.3%)  
150 had lost their fathers. Regarding the family's monthly income, 68 (46.9%) families earned  
151 between 5000 and 10000 SR monthly.

152 A total of 104 (71.7%) children started bed-wetting at the age of 5-6 years (Table 3) while  
153 19.3% started between the ages of 6 and 7 years. Furthermore, 126 (90%) children reported  
154 bed-wetting during sleep. As for the frequency of bed-wetting, it was once every night for 62  
155 (42.8%) children, 2-3 times per week in 43 (29.7%) children, and once a week in 17 (11.7%)  
156 children. Ninety-one (71.1%) children used the toilet before sleep, and 72 (49.7%) children  
157 had a habit of running to the toilet.

158 On analyzing the risk factors for bed-wetting in these children (Table 4), the most common  
159 child stressors were Attention Deficit and Hyperactivity Disorder (ADHD) (17.2%) followed by  
160 nyctophobia (dark phobia) (15.9%), stress and anxiety (11.7%), and living away from the  
161 father (9%). Regarding environmental stressors, being bullied at home by siblings was the  
162 most frequent (17.2%), followed by constant parental conflicts (16.6%), being bullied at  
163 school (13.8%), and moving out of or changing the house (13.1%). A total of 78 (53.8%)  
164 children were reported to hold their urine until the last second, and 31 (21.4%) were  
165 physically abused. Family history of nocturnal enuresis was reported in 20 (13.8%) children.  
166 Regarding the source of drinking water, 48.3% of the children reportedly consumed bottled  
167 water, while 47.6% of children consumed Saline Water Desalination Company.

168 Table 5 tabulates the consequences of bed-wetting among children. A total of 37 (25.5%)  
169 children relapsed after being pertinent. When considering the academic performance of  
170 these children, it was found that only 4 children performed poorly (2.8%), while the academic  
171 performance was excellent in 60 (41.4%) children; 40 (27.6%) children were below the  
172 school-going age.

173 Table 6. Distribution of frequency of bedwetting by children. Exact of 75.7% of children aged

174 above 6 years had frequent NE compared to 64.3% of others aged less than 6 years with  
175 statistical significance ( $P=.049$ ). Also, frequent NE was detected among 78.9% of 2nd  
176 children or more versus 52.8% of first child ( $P=.002$ ). A total of 76.8% of children non-  
177 working mother complained of frequent NE in comparison to 64% of others for working  
178 mothers ( $P=.048$ ). Other factors including child gender, social status of family, age of first NE  
179 and all were insignificantly associated with NE frequency.

180 Table 7. Frequency distribution of bedwetting by risk factors of Nocturnal Enuresis (NE).  
181 Frequent NE was detected among 80.5% of children with no environmental stressors  
182 compared to 61.9% of others with stressors with recorded statistical significance ( $P=.013$ ).  
183 Additionally, All other risk factors including child stressors, physical abuse, family history of  
184 NE, and source of drinking water were insignificantly associated with NE frequency among  
185 study children.

186 Table 8 represents the correctly prediction of bedwetting by children using significant risk  
187 factors of Nocturnal Enuresis (NE) by step wise binary logistic regression. Each step in the  
188 model represents the addition of a new variable to the previous step, indicating its influence  
189 on predicting bedwetting and the associated statistical significance.

190 The first step includes only one variable, "Child Order (1st child)," which has a p-value of  
191 0.003. This indicates that there is a statistically significant association between being the first  
192 child and bedwetting. The odds ratio (O.R.) of 3.346 suggests that being the first child  
193 increases the likelihood of bedwetting by approximately 3.346 times. The model correctly  
194 predicted bedwetting in 72.4% of cases at this step.

195 In the second step, "Environmental stressors (None)" is added as an additional variable. Its  
196 p-value is 0.034, indicating a statistically significant association with bedwetting. The odds  
197 ratio is 0.436, implying that the absence of environmental stressors decreases the likelihood  
198 of bedwetting by approximately 0.436 times. The model now correctly predicts bedwetting in  
199 73.8% of cases.

200 The third step introduces "Mother work (Not working/ retired)" as a new variable. It has a p-  
201 value of 0.031, suggesting a statistically significant association with bedwetting. The odds  
202 ratio is 0.406, indicating that not working or being retired reduces the likelihood of  
203 bedwetting by approximately 0.406 times. Additionally, "Environmental stressors (None)"

204 remains in the model. The correct prediction rate increases to 75.2% at this step.

205 In this step, two variables related to the age of onset of bedwetting are added: "Age of start  
206 NE (5 years)" and "Age of start NE (6-7 years)." Both variables have p-values indicating  
207 statistical significance. The odds ratios suggest that the age of onset affects the likelihood of  
208 bedwetting differently depending on the range. The model also retains "Child Order (1st  
209 child)" and "Mother work (Not working/ retired)" from previous steps. The correct prediction  
210 rate decreases slightly to 71.0%.

211 The fifth and final step involves the inclusion of two variables related to "Mother education"  
212 and retains all variables from the previous steps. "Mother education (Below secondary)" and  
213 "Mother education (Secondary)" have p-values indicating statistical significance. The odds  
214 ratios show how different levels of maternal education affect the likelihood of bedwetting.  
215 The model now achieves a higher correct prediction rate of 77.2%.

216 Overall, this multivariate analysis table provides insights into the stepwise selection of  
217 variables and their associations with bedwetting. It suggests that factors such as child order,  
218 environmental stressors, mother's work status, age of onset, and mother's education play a  
219 role in predicting bedwetting.

## 220 **Discussion**

221 The study revealed that one-third of children in our study sample complained of bed-wetting.  
222 Notably, there was significant variability in the estimated prevalence of NE among children in  
223 Saudi Arabia, ranging from 12% to 75% according to the study setting and the sampled age  
224 groups.<sup>16-18</sup> The estimated prevalence of nocturnal enuresis in different regions of Iran is  
225 reported as 8.25% to 8.8%,<sup>10-19</sup> compared to other studies conducted in Hong Kong, China,  
226 and Thailand<sup>9,20,21</sup>. Although the prevalence rate in Iran is higher, it is still lower than the  
227 reported prevalence in the Kingdom of Saudi Arabia, Turkey, and Burkina Faso.<sup>22-24</sup>  
228 Furthermore, in our study, bed-wetting was more frequent among male children than  
229 females and in children aged 6-12 years old; this age group is older than that reported in the  
230 existing literature.<sup>25,26</sup> Our finding is in-line with a previous survey in Saudi Arabia which  
231 found that the prevalence of NE were more in boys (62.9%) as compared to girls (37.1%).<sup>27</sup>  
232 There is no specific reason for this gender difference. No significant difference among boys  
233 and girls was reported in an Egyptian study.<sup>28</sup> The current study also revealed that bed-



234 wetting was more frequent among the first or last child. This phenomenon can be explained  
235 as an attention-seeking strategy adopted by older children who want to attract their parents'  
236 attention after the birth of a younger sibling.

237 The current study also revealed that nearly three-quarters of the children wet their bed  
238 between the age of 5-6 years, as many children have incomplete toilet training by this age  
239 and the immature nervous system is unable to fully control the bladder.<sup>29,30</sup> Regarding bed-  
240 wetting frequency, our results revealed that nearly half of the children (43%) did it every night,  
241 mainly during sleep time. This could be related to their urination behavior, as not all of them  
242 used the toilet before bedtime, and half of the children were habitual of running on feeling  
243 the urge to urinate, which means they waited until urgency (full bladder).

244 Regarding the risk factors analyzed among the current study in the children resorting to bed-  
245 wetting, child-related stressors were reported in almost half of the sampled children; it  
246 included ADHD, which is a major risk factor detected in different studies,<sup>31-33</sup> dark phobia,<sup>34,35</sup>  
247 stress and anxiety,<sup>36,37</sup> family troubles and parental separation,<sup>38</sup> exposure to bullying, and  
248 physical abuse.<sup>39,40</sup> We also observed that few children had a positive family history of  
249 nocturnal enuresis, one of the main risk factors, besides the water source, which was bottled  
250 water in nearly half of the sample. Considering this relatively moderate proportion of the  
251 children who wet their bed, relapse rate after being dry was reported in only a quarter of  
252 these children. Notably, this did not affect the scholastic achievement of the school-going  
253 children, as only 3% had poor performance, while it was excellent in 42% of the children. In  
254 this study factors such as child order, environmental stressors, mother's work status, age of  
255 onset, and mother's education were found significant predictors to bedwetting. Similar  
256 significant associations between enuresis and child's ages (years)  $P=0.002$ , residence  
257  $P=0.002$ , and child order  $P=0.003$  were found in another Saudi Study<sup>41</sup>. Nocturnal enuresis  
258 was found to be associated with younger age, low socioeconomic and low educational level  
259 of the parents, non-working mothers, and family history of enuresis in an Egyptian study<sup>28</sup>.  
260 The following factors may have led to certain limitations in the present study. The cross-  
261 sectional nature of this study cannot confirm the causality association between the  
262 compared variables. The self-reported responses could over or underestimate the results.  
263 This was an online survey and not all children and parents have access to social

264 media. In my opinion this is reflected by the fact that an important amount of parents  
265 had higher education levels. The authors did not use a voiding diary and evaluation of  
266 daytime symptoms in their study. We hope in future to have all the resources and less time  
267 constraints to do a comprehensive epidemiological survey and minimize the chances of the  
268 sampling bias. However the data included children of age groups 5–18 years and an  
269 extensive analysis has been made is the strength of our study.

## 270 **Conclusion**

271 The study revealed that nearly 1 out of 3 children had experienced bed-wetting, which was  
272 relatively more among boys than girls. Attention-deficit hyperactivity disorder, dark phobia,  
273 familiar troubles, and exposure to bullying were the most frequently reported risk factors.  
274 Regardless of the estimated high prevalence rate, nocturnal enuresis had no effect on a  
275 child's scholastic achievement. Overall, this study suggests that factors such as child order,  
276 environmental stressors, mother's work status, age of onset, and mother's education play a  
277 role in predicting bedwetting. The authors recommend early toilet training, a supportive  
278 parental attitude toward bed-wetting focusing on the child's physical and mental health to  
279 improve the quality of life for children who experience bed-wetting.

280

281 Funding: The authors extend their appreciation to the Deanship of Scientific Research at  
282 King Khalid University for funding this work through a large group Research Project under  
283 grant number RGP2/378/44

284 Institutional Review Board Statement: The study was conducted in accordance with the  
285 Declaration of Helsinki, and approved by the Institutional Research Ethical Committee of the  
286 College of Medicine, King Khalid University for studies involving humans.

287 Informed Consent Statement: Informed consent was obtained from all subjects involved in  
288 the study.

289 ***Data Availability Statement:*** *Not applicable*

290 Conflicts of Interest: The authors declare no conflict of interest.  
291

## 292 **REFERENCES**

293 1. Caldwell PH, Hodson E, Craig JC, Edgar D. Bed-wetting and toileting problems in

- 294 children. *Med J Aust.* 2005; 182:190-195.
- 295 2. Finnikin L. Bedwetting in children. *InnovAiT.* 2017; 10:729-733.
- 296 3. Butler RJ, Heron J. The prevalence of infrequent bed-wetting and nocturnal enuresis  
297 in childhood: a large British cohort. *Scand Journal Urol Nephrol.* 2008; 42: 257-264.
- 298 4. Wang QW, Wen JG, Song DK, Su J, Zhu QH, Liu K, et al. Bed-wetting in Chinese  
299 children: Epidemiology and predictive factors. *Neurouro Urology.* 2007; 26:512-517.
- 300 5. Butler RJ, Golding J, Northstone K, ALSPAC Study Team. Nocturnal enuresis at 7.5  
301 year-old: prevalence and analysis of clinical signs. *BJU Int.* 2005; 96:404-410.
- 302 6. Oge O, Kocak I, Gemalmaz H. Enuresis: point prevalence and associated factors  
303 among Turkish children. *Turk J Ped.* 2001; 43:38-43.
- 304 7. Joinson C, Heron J, Von Gontard A, Butler U, Emond A, Golding J. A prospective  
305 study of age at initiation of toilet training and subsequent daytime bladder control in  
306 school-age children. *J Dev Behav Ped.* 2009; 30:385-393.
- 307 8. Bed-wetting - Symptoms and causes - Mayo Clinic. Accessed on  
308 18 Oct. 2020. Available at [https://www.mayoclinic.org/diseases-conditions/bed-](https://www.mayoclinic.org/diseases-conditions/bed-wetting/symptoms-causes/syc-20366685)  
309 [wetting/symptoms-causes/syc-](https://www.mayoclinic.org/diseases-conditions/bed-wetting/symptoms-causes/syc-20366685) 20366685.
- 310 9. Ghotbi N, Kheirabadi GH. Prevalence of nocturia and its associated factors in  
311 primary school children in Sanandaj in 2002. *J Kurd Univ Med Sci.* 2001; 5:30-33.
- 312 10. Gür E, Turhan P, Can G, Akkus S, Sever L, Güzelöz S, et al Enuresis: prevalence,  
313 risk factors and urinary pathology among school children in Istanbul, Turkey. *Pediatr*  
314 *Int* 2004; 46:58-63.
- 315 11. Yeung CK. Nocturnal enuresis in Hong Kong: different Chinese phenotypes.  
316 *Scan J Urol Nephrol* 1997; 183:17-21.□
- 317 12. Jamali M, Rafiee GH. A comparison between the results of treatment with  
318 imipramine and oxybutynin in nonsymptomatic 6–12 children with enuresis. *J*  
319 *Rafsanjan Univ Med Sci* 2004; 3:113-117.
- 320 13. Özkan S, Durukan E, Iseri E, Gürocak S, Maral I, Bumin MA. Prevalence and risk  
321 factors of monosymptomatic nocturnal enuresis in Turkish children. *Indian J Urol:*  
322 *IJU: J Urol Soc Ind.* 2010;26:200.
- 323 14. Al-Zaben FN, Sehlo MG. Punishment for bed-wetting is associated with child

- 324 depression and reduced quality of life. *Child Abuse Neglect*. 2015; 43:22-29.
- 325 15. OpenEpi. Sample Size for X-Sectional, Cohort, and Clinical Trials. Available online:  
326 <https://www.openepi.com/SampleSize/SSCohort.htm> (accessed on 3 March 2022).
- 327 16. Kalo BB, Bella H. Enuresis: prevalence and associated factors among primary  
328 school children in Saudi Arabia. *Acta Paediatr*. 1996; 85:1217-1222.
- 329 17. Sherah K, Elsharief M, Barkat N, Jafery A. Prevalence of nocturnal enuresis in  
330 school-age children in Saudi Arabia. *Int J Med Dev Countries* 2019; 3:669-675.
- 331 18. Al-Nahdi FB, Al-Ahmadi R, Kalo B. The effect and the determinants of Behavioral  
332 and Motivational therapy among Children with Enuresis in Kindergarten, Makkah Al-  
333 Mukarramah, Saudi Arabia, 2018 A randomized control trial.
- 334 19. Kawauchi A, Tanaka Y, Yamao Y, Inaba M, Kanazawa M, Ukimura O, et al. Follow-  
335 up study of bed-wetting from 3 to 5 years of age. *Urology* 2001; 58:772-776.
- 336 20. Butler RJ, Heron J. The prevalence of infrequent bed-wetting and nocturnal enuresis  
337 in childhood: a large British cohort. *Scand J Urol Nephrol*. 2008; 42:257-264.
- 338 21. Hansakunachai T, Ruangdaraganon N, Udomsubpayakul U, Sombuntham T,  
339 Kotchabhakdi N. Epidemiology of enuresis among school-age children in Thailand. *J*  
340 *Dev Behav Ped*. 2005; 26:356-360.
- 341 22. Kalo BB, Bella H. Enuresis: prevalence and associated factors among primary  
342 school children in Saudi Arabia. *Acta Paedia*. 1996; 85:1217-1222.
- 343 23. Serel TA, Akhan G, Koyuncuoğlu HR, Öztürk A, Doğruer K, Ünal S, et al.  
344 Epidemiology of enuresis in Turkish children. *Scand J Urol Nephrol* 1997; 31:537-  
345 539.
- 346 24. Ouédraogo A, Kere M, Ouédraogo TL, Jesu F. Epidemiology of enuresis  
347 among children and teenagers, 5 to 16-year old, in Ouagadougou (Burkina Faso).  
348 *Arch de Ped*. 1997; 10: 947-951.
- 349 25. Karbasi A, Golestan M, Fallah R. Nocturnal enuresis in children at the age of six and  
350 its associated factors. *Ofoogh-e Danesh* 2009; 15:63–70.
- 351 26. Liu X, Sun Z, Uchiyama M, Li YA, Okawa M. Attaining nocturnal urinary control,  
352 nocturnal enuresis, and behavioral problems in Chinese children aged 6 through 16  
353 years. *J Am Acad Child Adol Psych*. 2000; 39:1557-1564.

- 354 27. Alshahrani A, Selim M, Abbas M. Prevalence of nocturnal enuresis among children  
355 in Primary Health Care Centers of Family and Community Medicine, PSMMC,  
356 Riyadh City, KSA. *J Family Med Prim Care*. 2018 Sep-Oct;7(5):937-941. doi:  
357 10.4103/jfmpc.jfmpc\_32\_18. PMID: 30598936; PMCID: PMC6259524.
- 358 28. Kamal NN, Mahrous DM .The Epidemiology and Factors Associated with Nocturnal  
359 Enuresis among Primary School Children in Minia City, Egypt. *The Egyptian Journal*  
360 *of Community Medicine* 2019; 37(1) : 63-71.
- 361 29. Blum NJ, Taubman B, Nemeth N. Why is toilet training occurring at older ages? A  
362 study of factors associated with later training. *J Ped*. 2004; 145(1):107-111.□
- 363 30. Joinson C, Heron J, Von Gontard A, Butler U, Emond A, et al. A prospective study of  
364 age at initiation of toilet training and subsequent daytime bladder control in school-  
365 age children. *J Dev Behav Pediatr* 2009; 30:385-393.
- 366 31. Rey JM, Bird KD, Hensley VR. Bed-wetting and psychopathology in  
367 adolescents. *J Pediatr Child Health*. 1995; 31:508-511□
- 368 32. Baeyens D, Roeyers H, Walle JV, Hoebeke P. Behavioural problems and attention-  
369 deficit hyperactivity disorder in children with enuresis: a literature review. *Eur J*  
370 *Pediatr* 2005; 164: 665-672.
- 371 33. Baeyens D, Roeyers H, Van Erdeghem S, Hoebeke P, Vande Walle J. The  
372 prevalence of attention deficit-hyperactivity disorder in children with  
373 nonmonosymptomatic nocturnal enuresis: a 4-year follow-up study. *J Urol* 2007;  
374 178: 2616-2620.
- 375 34. Joinson C, Heron J, Emond A, Butler R. Psychological problems in children with  
376 bed-wetting and combined (day and night) wetting: A UK population-based study. *J*  
377 *Ped Psychol*. 2007; 32:605-616.
- 378 35. Robertson JG. An excess of phobias and manias. Senior Scribe Publications; 2003.
- 379 36. Abdul-Rahman S, Hussain R, Abdul-Rahman S. Prevalence of bed-wetting for  
380 children in Mosul City. *Jordanian Med J*. 2009; 43:44-50.
- 381 37. Couchells SM, Johnson SB, Carter R, Walker D. Behavioral and environmental  
382 characteristics of treated and untreated enuretic children and matched nonenuretic  
383 controls. *J Pediatr* 1981; 99:812-816.

- 384 38. Mohammed AH, Saleh AG, Al Zoheiry I. Frequency of bed-wetting among primary  
385 school children in Benha city, Egypt. *Egyptian J Med Hum Genet* 2014; 15:287-292.
- 386 39. Williams K, Chambers M, Logan S, Robinson D. Association of common health  
387 symptoms with bullying in primary school children. *Br Med J* 1996; 313: 17-9.
- 388 40. MacKinlay D. Break the bed-wetting taboo. *Pract Prof Child Care*. 2007; 4(10).
- 389 41. Goweda R, Badr H, Benjabi W, Kalantan R, Kalantan R. Nocturnal enuresis among  
390 children: prevalence and risk factors. *Medical Science*, 2020, 24(106), 4698-4706
- 391

392 **Table 1. Demographic data of children with nocturnal enuresis in the Aseer region, Saudi**  
393 **Arabia.**  
394

| <b>Demographic parameters</b>             | <b>Frequency</b> | <b>Percentage</b> |
|-------------------------------------------|------------------|-------------------|
| <b>Gender</b>                             |                  |                   |
| <i>Male</i>                               | 85               | 58.6%             |
| <i>Female</i>                             | 60               | 41.4%             |
| <b>Age</b>                                |                  |                   |
| <i>5- 6 years</i>                         | 42               | 28.9%             |
| <i>7-8 years</i>                          | 46               | 31.7%             |
| <i>9-12 years</i>                         | 45               | 31.0%             |
| <i>&gt; 12 years</i>                      | 12               | 8.3%              |
| <b>Residential background</b>             |                  |                   |
| <i>Urban</i>                              | 96               | 66.2%             |
| <i>Rural</i>                              | 49               | 33.8%             |
| <b>Order of birth</b>                     |                  |                   |
| <i>1<sup>st</sup></i>                     | 36               | 24.8%             |
| <i>2<sup>nd</sup></i>                     | 35               | 24.1%             |
| <i>3<sup>rd</sup></i>                     | 19               | 13.1%             |
| <i>4th or more</i>                        | 55               | 37.9%             |
| <b>Complications during delivery</b>      |                  |                   |
| <i>Yes</i>                                | 19               | 13.1%             |
| <i>No</i>                                 | 126              | 86.9%             |
| <b>Chronic health problems</b>            |                  |                   |
| <i>None</i>                               | 122              | 84.1%             |
| <i>Constipation</i>                       | 9                | 6.2%              |
| <i>Recurrent Urinary Tract Infections</i> | 5                | 3.4%              |
| <i>Sinusitis</i>                          | 4                | 2.8%              |
| <i>Mental retardation</i>                 | 1                | .7%               |

*Urinary congenital anomalies* 2 1.4%

*Epilepsy / neurological diseases* 1 .7%

---

395

396

397

398 **Table 2. Family characteristics of children with nocturnal enuresis in the Aseer region, Saudi**  
399 **Arabia**

400

| <b>Characteristic</b>                     | <b>Frequency</b> | <b>Percentage</b> |
|-------------------------------------------|------------------|-------------------|
| <b>Father's education</b>                 |                  |                   |
| <i>Below secondary</i>                    | 24               | 16.6%             |
| <i>Secondary</i>                          | 35               | 24.1%             |
| <i>University/ more</i>                   | 86               | 59.3%             |
| <b>Mother's education</b>                 |                  |                   |
| <i>Below secondary</i>                    | 30               | 20.7%             |
| <i>Secondary</i>                          | 31               | 21.4%             |
| <i>University/ more</i>                   | 84               | 57.9%             |
| <b>Father's work status</b>               |                  |                   |
| <i>Not working/ retired</i>               | 36               | 24.8%             |
| <i>Working</i>                            | 97               | 66.9%             |
| <i>Deceased</i>                           | 12               | 8.3%              |
| <b>Mother's work status</b>               |                  |                   |
| <i>Not working/ retired</i>               | 95               | 65.5%             |
| <i>Working</i>                            | 50               | 34.5%             |
| <b>Monthly income</b>                     |                  |                   |
| <i>&lt; 5000 SR (1233 EUR)</i>            | 38               | 26.2%             |
| <i>5000-10000 SR (1233 EUR-2466 EUR)</i>  | 68               | 46.9%             |
| <i>10000-15000 SR (2466 EUR-3699 EUR)</i> | 39               | 26.9%             |
| <b>Social status of parents</b>           |                  |                   |
| <i>Married</i>                            | 124              | 85.5%             |
| <i>Separated</i>                          | 14               | 9.7%              |
| <i>Father deceased</i>                    | 7                | 4.8%              |
| <b>Chronic health problem of parent</b>   |                  |                   |
| <i>None</i>                               | 58               | 40.0%             |
| <i>Diabetes Mellitus</i>                  | 66               | 45.5%             |
| <i>Hypertension</i>                       | 33               | 22.8%             |
| <i>Urinary Tract Infections</i>           | 19               | 13.1%             |
| <i>Renal problems</i>                     | 10               | 6.9%              |

401

402

403

404



405

406

407

**Table 3. Data related to bed-wetting in the 145 children**

| <b>Parameter</b>                                        | <b>Frequency</b> | <b>Percentage</b> |
|---------------------------------------------------------|------------------|-------------------|
| <b>Age of start bed-wetting</b>                         |                  |                   |
| <i>5 years</i>                                          | <i>104</i>       | <i>71.7%</i>      |
| <i>6-7 years</i>                                        | <i>28</i>        | <i>19.3%</i>      |
| <i>8-10 years</i>                                       | <i>13</i>        | <i>9.0%</i>       |
| <b>Time of bed-wetting</b>                              |                  |                   |
| <i>All-day</i>                                          | <i>14</i>        | <i>10.0%</i>      |
| <i>During sleep</i>                                     | <i>126</i>       | <i>90.0%</i>      |
| <b>Frequency of bed-wetting</b>                         |                  |                   |
| <i>Once every night</i>                                 | <i>62</i>        | <i>42.8%</i>      |
| <i>2-3 times/ week</i>                                  | <i>43</i>        | <i>29.7%</i>      |
| <i>Once / week</i>                                      | <i>17</i>        | <i>11.7%</i>      |
| <i>2-3 / month</i>                                      | <i>10</i>        | <i>6.9%</i>       |
| <i>Once / month or more</i>                             | <i>13</i>        | <i>9.0%</i>       |
| <b>Does the child use the toilet before sleep time?</b> |                  |                   |
| <i>Yes</i>                                              | <i>91</i>        | <i>71.1%</i>      |
| <i>No</i>                                               | <i>10</i>        | <i>7.8%</i>       |
| <i>Do not know</i>                                      | <i>27</i>        | <i>21.1%</i>      |
| <b>Does the child have to run to the toilet?</b>        |                  |                   |
| <i>Yes</i>                                              | <i>72</i>        | <i>49.7%</i>      |
| <i>No</i>                                               | <i>53</i>        | <i>36.6%</i>      |
| <i>Do not know</i>                                      | <i>20</i>        | <i>13.8%</i>      |

408

409

410

411

412

413

414

**Table 4. Risk factors for bed-wetting in the children of the Aseer region, Saudi Arabia**

| <b>Risk factors</b>                                                   | <b>Frequency</b> | <b>Percentage</b> |
|-----------------------------------------------------------------------|------------------|-------------------|
| <b>Child stressors/comorbidities</b>                                  |                  |                   |
| <i>None</i>                                                           | 80               | 55.2%             |
| <i>ADHD</i>                                                           | 25               | 17.2%             |
| <i>Nyctophobia (dark phobia).</i>                                     | 23               | 15.9%             |
| <i>Stress &amp; anxiety</i>                                           | 17               | 11.7%             |
| <i>Living away from father</i>                                        | 13               | 9.0%              |
| <i>Lack of attention</i>                                              | 7                | 4.8%              |
| <i>Depression</i>                                                     | 3                | 2.1%              |
| <i>Social phobia</i>                                                  | 5                | 3.4%              |
| <b>Environmental stressors</b>                                        |                  |                   |
| <i>None</i>                                                           | 82               | 56.6%             |
| <i>Being bullied at school by others</i>                              | 20               | 13.8%             |
| <i>Continuous problems between the parents.</i>                       | 24               | 16.6%             |
| <i>Moving out and changing the house.</i>                             | 19               | 13.1%             |
| <i>Being bullied at home by siblings.</i>                             | 25               | 17.2%             |
| <i>Moving out and changing school.</i>                                | 5                | 3.4%              |
| <b>Does your child hold his urine until the last second?</b>          |                  |                   |
| <i>Yes</i>                                                            | 78               | 53.8%             |
| <i>No</i>                                                             | 28               | 19.3%             |
| <i>Do not know</i>                                                    | 39               | 26.9%             |
| <b>Is the child physically abused?</b>                                |                  |                   |
| <i>Yes</i>                                                            | 31               | 21.4%             |
| <i>No</i>                                                             | 96               | 66.2%             |
| <i>Do not know</i>                                                    | 18               | 12.4%             |
| <b>Does any of the family members suffer from nocturnal enuresis?</b> |                  |                   |
| <i>Yes</i>                                                            | 20               | 13.8%             |
| <i>No</i>                                                             | 107              | 73.8%             |
| <i>Do not know</i>                                                    | 18               | 12.4%             |
| <b>Source of drinking water</b>                                       |                  |                   |
| <i>Wells</i>                                                          | 6                | 4.1%              |
| <i>Saline Water Desalination Company</i>                              | 69               | 47.6%             |
| <i>Bottled water</i>                                                  | 70               | 48.3%             |

415

416

417

418

419  
420

**Table 5. Consequences of bed-wetting among children in the Aseer region, Saudi Arabia**

| <b>Consequences of bed-wetting</b>                                              | <b>Frequency</b> | <b>Percentage</b> |
|---------------------------------------------------------------------------------|------------------|-------------------|
| <b>Did your child's problem (bed-wetting) get relapsed after it was normal?</b> |                  |                   |
| <i>Yes</i>                                                                      | 37               | 25.5%             |
| <i>No</i>                                                                       | 108              | 74.5%             |
| <b>Academic performance</b>                                                     |                  |                   |
| <i>Below school-going age</i>                                                   | 40               | 27.6%             |
| <i>Poor</i>                                                                     | 4                | 2.8%              |
| <i>Good</i>                                                                     | 41               | 28.3%             |
| <i>Excellent</i>                                                                | 60               | 41.4%             |

421  
422  
423

424

425

426

**Table 6. Distribution of frequency of bedwetting by children**

| <i>Bio-demographic data</i>          |                            | <i>Frequency of Nocturnal Enuresis</i> |          |                            |          | <i>p-value</i>    |
|--------------------------------------|----------------------------|----------------------------------------|----------|----------------------------|----------|-------------------|
|                                      |                            | <i>Frequent (nearly daily)</i>         |          | <i>Infrequent (weekly)</i> |          |                   |
|                                      |                            | <i>N</i>                               | <i>%</i> | <i>N</i>                   | <i>%</i> |                   |
| <b>Child gender</b>                  | <i>Male</i>                | 60                                     | 70.6%    | 25                         | 29.4%    | .558              |
|                                      | <i>Female</i>              | 45                                     | 75.0%    | 15                         | 25.0%    |                   |
| <b>Child age</b>                     | <i>&lt; 6 years</i>        | 27                                     | 64.3%    | 15                         | 35.7%    | .049*             |
|                                      | <i>&gt; 6 years</i>        | 78                                     | 75.7%    | 25                         | 24.3%    |                   |
| <b>Child order</b>                   | <i>1st child</i>           | 19                                     | 52.8%    | 17                         | 47.2%    | .002*             |
|                                      | <i>2nd or more</i>         | 86                                     | 78.9%    | 23                         | 21.1%    |                   |
| <b>Child chronic health problems</b> | <i>No</i>                  | 90                                     | 73.8%    | 32                         | 26.2%    | .400              |
|                                      | <i>Yes</i>                 | 15                                     | 65.2%    | 8                          | 34.8%    |                   |
| <b>Social status of parents</b>      | <i>Together</i>            | 88                                     | 71.0%    | 36                         | 29.0%    | .602 <sup>#</sup> |
|                                      | <i>Separated</i>           | 11                                     | 78.6%    | 3                          | 21.4%    |                   |
|                                      | <i>Father dead</i>         | 6                                      | 85.7%    | 1                          | 14.3%    |                   |
| <b>Father education</b>              | <i>Below secondary</i>     | 19                                     | 79.2%    | 5                          | 20.8%    | .719              |
|                                      | <i>Secondary</i>           | 25                                     | 71.4%    | 10                         | 28.6%    |                   |
|                                      | <i>University/ more</i>    | 61                                     | 70.9%    | 25                         | 29.1%    |                   |
| <b>Mother education</b>              | <i>Below secondary</i>     | 20                                     | 66.7%    | 10                         | 33.3%    | .452              |
|                                      | <i>Secondary</i>           | 25                                     | 80.6%    | 6                          | 19.4%    |                   |
|                                      | <i>University/ more</i>    | 60                                     | 71.4%    | 24                         | 28.6%    |                   |
| <b>Mother work</b>                   | <i>Not working/retired</i> | 73                                     | 76.8%    | 22                         | 23.2%    | .048*             |
|                                      | <i>Working</i>             | 32                                     | 64.0%    | 18                         | 36.0%    |                   |
| <b>Age of start NE</b>               | <i>&lt; 5 years</i>        | 78                                     | 75.0%    | 26                         | 25.0%    | .301              |
|                                      | <i>5-7 years</i>           | 17                                     | 60.7%    | 11                         | 39.3%    |                   |
|                                      | <i>8-10 years</i>          | 10                                     | 76.9%    | 3                          | 23.1%    |                   |
| <b>Time of nocturnal enuresis</b>    | <i>All day</i>             | 9                                      | 64.3%    | 5                          | 35.7%    | .533 <sup>#</sup> |
|                                      | <i>During sleeping</i>     | 91                                     | 72.2%    | 35                         | 27.8%    |                   |

427

428

429

430

*P*: Pearson  $X^2$  test #Exact probability test

\**P* < 0.05 (significant)

431

432 **Table 7. Frequency distribution of bedwetting by risk factors of Nocturnal Enuresis (NE)**

433

| NE risk factors                                                        | <i>Frequency of NE</i>                     |          |                            |          | <i>P-value</i> |                   |
|------------------------------------------------------------------------|--------------------------------------------|----------|----------------------------|----------|----------------|-------------------|
|                                                                        | <i>Frequent (nearly daily)</i>             |          | <i>Infrequent (weekly)</i> |          |                |                   |
|                                                                        | <i>No</i>                                  | <i>%</i> | <i>No</i>                  | <i>%</i> |                |                   |
| <b>Child stressors</b>                                                 | <i>None</i>                                | 58       | 72.5%                      | 22       | 27.5%          | .979              |
|                                                                        | <i>Yes</i>                                 | 47       | 72.3%                      | 18       | 27.7%          |                   |
| <b>Environmental stressors</b>                                         | <i>None</i>                                | 66       | 80.5%                      | 16       | 19.5%          | .013*             |
|                                                                        | <i>Yes</i>                                 | 39       | 61.9%                      | 24       | 38.1%          |                   |
| <b>Does your child hold his urine until the last second?</b>           | <i>Yes</i>                                 | 58       | 74.4%                      | 20       | 25.6%          | .642              |
|                                                                        | <i>No</i>                                  | 21       | 75.0%                      | 7        | 25.0%          |                   |
|                                                                        | <i>Don't know</i>                          | 26       | 66.7%                      | 13       | 33.3%          |                   |
| <b>Is the child being physically abused?</b>                           | <i>Yes</i>                                 | 23       | 74.2%                      | 8        | 25.8%          | .518              |
|                                                                        | <i>No</i>                                  | 71       | 74.0%                      | 25       | 26.0%          |                   |
|                                                                        | <i>Don't know</i>                          | 11       | 61.1%                      | 7        | 38.9%          |                   |
| <b>Does any of the family member suffer from a nocturnal enuresis?</b> | <i>Yes</i>                                 | 12       | 60.0%                      | 8        | 40.0%          | .399              |
|                                                                        | <i>No</i>                                  | 80       | 74.8%                      | 27       | 25.2%          |                   |
|                                                                        | <i>Don't know</i>                          | 13       | 72.2%                      | 5        | 27.8%          |                   |
| <b>Source of drinking water for the family</b>                         | <i>Wells</i>                               | 4        | 66.7%                      | 2        | 33.3%          | .526 <sup>#</sup> |
|                                                                        | <i>Saline water conversion corporation</i> | 53       | 76.8%                      | 16       | 23.2%          |                   |
|                                                                        | <i>Bottled water</i>                       | 48       | 68.6%                      | 22       | 31.4%          |                   |

434 *P*: Pearson  $X^2$  test #Exact probability test

435 \* *P* < 0.05 (significant)

436

437

438

439

440

441 Table 8: Forward stepwise likelihood model with correctly predicted of bedwetting by risk  
 442 factors of Nocturnal Enuresis (NE)

|                     | Variables included in the model    | Regression coefficient (B) | Standard error (B) | P value | Odds Ratio | 95% C.I.for Odds Ratio                                  |                                                               | Correctly predicted % |
|---------------------|------------------------------------|----------------------------|--------------------|---------|------------|---------------------------------------------------------|---------------------------------------------------------------|-----------------------|
|                     |                                    |                            |                    |         |            | Lower                                                   | Upper                                                         |                       |
| Step 1 <sup>a</sup> | Child Order(1st child)             | 1.208                      | .408               | .003    | 3.346      | 1.503                                                   | 7.445                                                         | 72.4                  |
|                     | Constant                           | -1.319                     | .235               | .000    | .267       |                                                         |                                                               |                       |
| Step 2 <sup>b</sup> | Child Order(1st child)             | 1.115                      | .417               | .007    | 3.051      | 1.348<br>.202                                           | 6.903<br>.940                                                 | 73.8                  |
|                     | Environmental stressors(None)      | -.830                      | .392               | .034    | .436       |                                                         |                                                               |                       |
|                     | Constant                           | -.864                      | .306               | .005    | .421       |                                                         |                                                               |                       |
| Step 3 <sup>c</sup> | Child Order(1st child)             | 1.237                      | .430               | .004    | 3.445      | 1.482<br>.180<br>.178                                   | 8.009<br>.920<br>.869                                         | 75.2                  |
|                     | Mother work(Not working/ retired)  | -.900                      | .417               | .031    | .406       |                                                         |                                                               |                       |
|                     | Environmental stressors(None)      | -.932                      | .404               | .021    | .394       |                                                         |                                                               |                       |
|                     | Constant                           | -.291                      | .399               | .466    | .747       |                                                         |                                                               |                       |
| Step 4 <sup>d</sup> | Child Order(1st child)             | 1.488                      | .456               | .001    | 4.427      | 1.810<br>.151<br>.403<br>.987<br>.161                   | 10.826<br>.829<br>7.537<br>26.035<br>.844                     | 71.0                  |
|                     | Mother work(Not working/ retired)  | -1.038                     | .434               | .017    | .354       |                                                         |                                                               |                       |
|                     | Age of start NE (5 years)          | .555                       | .747               | .458    | 1.742      |                                                         |                                                               |                       |
|                     | Age of start NE (6-7 years)        | 1.623                      | .835               | .052    | 5.070      |                                                         |                                                               |                       |
|                     | Environmental stressors(None)      | -1.000                     | .423               | .018    | .368       |                                                         |                                                               |                       |
|                     | Constant                           | -.992                      | .744               | .182    | .371       |                                                         |                                                               |                       |
| Step 5 <sup>e</sup> | Child Order (1st child)            | 1.765                      | .496               | .000    | 5.843      | 2.211<br>1.228<br>.272<br>.069<br>.545<br>1.336<br>.131 | 15.440<br>15.637<br>2.774<br>.582<br>15.309<br>53.460<br>.751 | 77.2                  |
|                     | Mother education (Below secondary) | 1.477                      | .649               | .023    | 4.381      |                                                         |                                                               |                       |
|                     | Mother education (Secondary)       | -.140                      | .592               | .813    | .869       |                                                         |                                                               |                       |
|                     | Mother work (Not working/ retired) | -1.605                     | .543               | .003    | .201       |                                                         |                                                               |                       |
|                     | Age of start NE (< 5 years)        | 1.060                      | .851               | .213    | 2.888      |                                                         |                                                               |                       |
|                     | Age of start NE (5-7 years)        | 2.134                      | .941               | .023    | 8.451      |                                                         |                                                               |                       |

|  |                               |        |      |      |      |  |  |  |
|--|-------------------------------|--------|------|------|------|--|--|--|
|  | Environmental stressors(None) | -1.160 | .446 | .009 | .313 |  |  |  |
|  | Constant                      | -1.403 | .860 | .103 | .246 |  |  |  |

443 a: step 1: Child Order; b: step 2: Environmental stressors; c: step 3: Mother work; d: step 4: age of start NE; e: step 5:  
444 Mother education.

445

446

447

448
